# Supplementary material for: Validation of a new glucocorticoid-specific Patient-Reported Outcome Questionnaire (the Steroid PRO)
Source: PubMed Central journal article supplement — Ann Rheum Dis. 2023 Nov 10;83(3):394–400. doi: 10.1136/ard-2023-224946 (PMC10894813; doi:10.1136/ard-2023-224946), 2023-11-10

**SUPPLEMENTARY MATERIAL: Validation of a new glucocorticoid-specific patient reported outcome questionnaire (the Steroid PRO)**

**Supplementary Table S1:** Survey responses at Timepoint 1; full list of diseases

|                                                                                        | <b>n</b> |     |
|----------------------------------------------------------------------------------------|----------|-----|
| Adult-onset Still's disease                                                            | 1        | 0%  |
| ANCA Vasculitis (NOS)                                                                  | 5        | 0%  |
| Ankylosing spondylitis                                                                 | 9        | 1%  |
| Aortitis                                                                               | 1        | 0%  |
| Behcet's disease                                                                       | 20       | 2%  |
| CNS Vasculitis                                                                         | 7        | 1%  |
| Cryoglobulinemia vasculitis                                                            | 2        | 0%  |
| Enteropathic arthritis                                                                 | 2        | 0%  |
| Eosinophilic granulomatosis with polyangiitis (also known as Churg Strauss Vasculitis) | 34       | 3%  |
| Giant Cell Arteritis (also known as Temporal Arteritis)                                | 128      | 11% |
| Gout                                                                                   | 3        | 0%  |
| Granulomatosis with polyangiitis (Wegener's)                                           | 110      | 9%  |
| IgA/Henoch Schonlein                                                                   | 8        | 1%  |
| IgG4-related disease                                                                   | 1        | 0%  |
| Inflammatory arthritis (NOS)                                                           | 2        | 0%  |
| Inflammatory myositis (polymyositis or dermatomyositis)                                | 10       | 1%  |
| Juvenile inflammatory arthritis (JIA)                                                  | 7        | 1%  |
| Large Vessel Vasculitis (NOS)                                                          | 2        | 0%  |
| Leukocytoclastic vasculitis                                                            | 1        | 0%  |
| Mast Cell Activation Disorder                                                          | 1        | 0%  |
| Microscopic polyangiitis                                                               | 24       | 2%  |

|                                             |     |     |
|---------------------------------------------|-----|-----|
| Mixed connective tissue disease             | 20  | 2%  |
| Palindromic rheumatism                      | 4   | 0%  |
| Polyarteritis nodosa                        | 10  | 1%  |
| Polymyalgia rheumatica                      | 302 | 26% |
| Psoriatic arthritis                         | 21  | 2%  |
| Reactive arthritis                          | 10  | 1%  |
| Relapsing polychondritis                    | 3   | 0%  |
| Rheumatoid arthritis                        | 164 | 14% |
| Seronegative arthritis/spondyloarthropathy  | 8   | 1%  |
| Sjogren's syndrome                          | 31  | 3%  |
| Small vessel vasculitis (NOS)               | 11  | 1%  |
| Systemic Lupus Erythematosus (Lupus or SLE) | 66  | 6%  |
| Systemic sarcoidosis                        | 64  | 6%  |
| Systemic sclerosis (Scleroderma)            | 32  | 3%  |
| Takayasu arteritis                          | 18  | 2%  |
| Undifferentiated rheumatic disease          | 10  | 1%  |
| Urticarial vasculitis                       | 11  | 1%  |

NB: Participants were able to report multiple diseases

**Supplementary Table S2: Survey responses at Timepoint 1; participant ethnicities**

|                                                       | n          |     |
|-------------------------------------------------------|------------|-----|
| English / Welsh / Scottish / Northern Irish / British | 693        | 73% |
| American                                              | 117        | 12% |
| Australian                                            | 41         | 4%  |
| Irish                                                 | 18         | 2%  |
| American Indian / Alaska Native                       | 4          | 0%  |
| African                                               | 6          | 1%  |
| Black British                                         | 2          | 0%  |
| Chinese                                               | 4          | 0%  |
| Indian                                                | 3          | 0%  |
| Pakistani                                             | 2          | 0%  |
| Other ethnic background                               | 11         | 1%  |
| Other Asian background                                | 2          | 0%  |
| Other black background                                | 3          | 0%  |
| Other white background                                | 30         | 3%  |
| Prefer not to answer                                  | 10         | 1%  |
| <b>Total completed responses</b>                      | <b>946</b> |     |

**Supplementary Table S3: Rasch Analysis with individual items, comparing 5 and 4 category response structure**

| Seq                | Item                      | 5 Category responses<br>(never=0, rarely=1, sometimes=2, often=3 and always=4) |       |          |          |    | 4 Category responses<br>(never=0, sometimes=1, often=2 and always=3) |          |       |          |          |    |          |
|--------------------|---------------------------|--------------------------------------------------------------------------------|-------|----------|----------|----|----------------------------------------------------------------------|----------|-------|----------|----------|----|----------|
|                    |                           | Location                                                                       | SE    | FitResid | $\chi^2$ | DF | *p-value                                                             | Location | SE    | FitResid | $\chi^2$ | DF | *p-value |
| 10                 | Fatigue/ tiredness        | -0.76                                                                          | 0.037 | 1.76     | 14.865   | 9  | 0.094708                                                             | -0.864   | 0.042 | 2.298    | 13.763   | 9  | 0.131019 |
| 15                 | Appearance changes        | -0.472                                                                         | 0.031 | 0.873    | 8.439    | 9  | 0.490604                                                             | -0.686   | 0.037 | 0.007    | 9.645    | 9  | 0.379995 |
| 16                 | Clothes not fitting       | -0.269                                                                         | 0.031 | -0.036   | 2.197    | 9  | 0.987949                                                             | -0.428   | 0.037 | -0.853   | 5.141    | 9  | 0.821816 |
| 20                 | Anger/ irritation         | 0.433                                                                          | 0.037 | 0.156    | 12.757   | 9  | 0.173922                                                             | 0.609    | 0.046 | -0.453   | 13.132   | 9  | 0.156715 |
| 23                 | Anxiety                   | 0.482                                                                          | 0.036 | -0.26    | 6.628    | 9  | 0.675758                                                             | 0.618    | 0.046 | 0.03     | 6.268    | 9  | 0.712872 |
| 24                 | Physical agitation        | 0.551                                                                          | 0.037 | 0.222    | 11.651   | 9  | 0.233731                                                             | 0.745    | 0.047 | 0.093    | 11.445   | 9  | 0.246461 |
| 26                 | Clarity of thinking       | 0.663                                                                          | 0.037 | -0.438   | 23.113   | 9  | 0.005948                                                             | 0.818    | 0.048 | -0.928   | 18.706   | 9  | 0.027816 |
| 27                 | Talking too much          | 1.068                                                                          | 0.038 | 2.272    | 23.364   | 9  | 0.005431                                                             | 1.271    | 0.052 | 0.322    | 10.53    | 9  | 0.309318 |
| 28                 | Feeling upset             | -0.029                                                                         | 0.033 | -1.623   | 14.107   | 9  | 0.118581                                                             | -0.08    | 0.04  | -2.406   | 11.363   | 9  | 0.251663 |
| 29                 | Extra medications         | -0.03                                                                          | 0.033 | 0.795    | 7.202    | 9  | 0.616128                                                             | -0.118   | 0.04  | -0.092   | 5.841    | 9  | 0.755673 |
| 30                 | Long-term risks           | -0.951                                                                         | 0.037 | 1.684    | 7.884    | 9  | 0.545882                                                             | -1.032   | 0.041 | 2.233    | 6.741    | 9  | 0.664059 |
| 31                 | Worrying about weight     | -0.773                                                                         | 0.034 | 1.229    | 12.082   | 9  | 0.208727                                                             | -0.99    | 0.039 | 0.974    | 5.111    | 9  | 0.824522 |
| 38                 | Everyday responsibilities | -0.027                                                                         | 0.034 | -0.462   | 13.881   | 9  | 0.126632                                                             | -0.001   | 0.041 | -0.439   | 9.861    | 9  | 0.361824 |
| 39                 | Being with other people   | 0.161                                                                          | 0.034 | 2.232    | 2.535    | 9  | 0.979935                                                             | 0.159    | 0.043 | 3.12     | 4.009    | 9  | 0.910832 |
| 40                 | Joining in                | -0.048                                                                         | 0.036 | -2.123   | 20.561   | 9  | 0.014751                                                             | -0.019   | 0.043 | -2.088   | 24.372   | 9  | 0.003752 |
| <b>Overall fit</b> |                           | $\chi^2$ (DF) 181.26(135); p=0.0049; PSI=0.8997                                |       |          |          |    | $\chi^2$ (DF) 155.93 (135); p=0.105; PSI=0.877                       |          |       |          |          |    |          |

Legends: SE, Standard error; DF, degree of freedom; FitResid, Fit residuals expected to be within -2.5 and 2.5 for model fit;

\*p-value,  $\chi^2$  probability, where >0.05 (>0.00125 for Bonferroni correction for 5 Category responses, >0.0033 for Bonferroni correction for 4 Category responses) suggests adequate fit to the model.

**Supplementary Table S4: Results of DIF analysis in the disease groups (IA, CTD/Vasculitis and GCA/PMR)**

|                         | <i>Main effects: Disease group<br/>(uniform DIF)</i> |          |           |                | <i>Interaction effects: class interval<br/>by disease (non-uniform DIF)</i> |          |           |                |
|-------------------------|------------------------------------------------------|----------|-----------|----------------|-----------------------------------------------------------------------------|----------|-----------|----------------|
|                         | <b>MS</b>                                            | <b>F</b> | <b>DF</b> | <b>p-value</b> | <b>MS</b>                                                                   | <b>F</b> | <b>DF</b> | <b>p-value</b> |
| Social impact           | 0.475                                                | 0.661    | 2         | 0.517          | 1.013                                                                       | 1.408    | 18        | 0.119          |
| Impact on<br>appearance | 2.677                                                | 3.467    | 2         | 0.032          | 0.421                                                                       | 0.545    | 18        | 0.937          |
| Psychological<br>impact | 3.454                                                | 4.903    | 2         | 0.008          | 0.573                                                                       | 0.814    | 18        | 0.685          |
| Treatment<br>Concerns   | 9.481                                                | 12.013   | 2         | <0.001         | 0.629                                                                       | 0.797    | 18        | 0.705          |
| Expected                |                                                      |          |           | >0.0125        |                                                                             |          |           | >0.0125        |

Supplementary Figure S1: Item characteristic curves for DIF analysis in the disease groups.

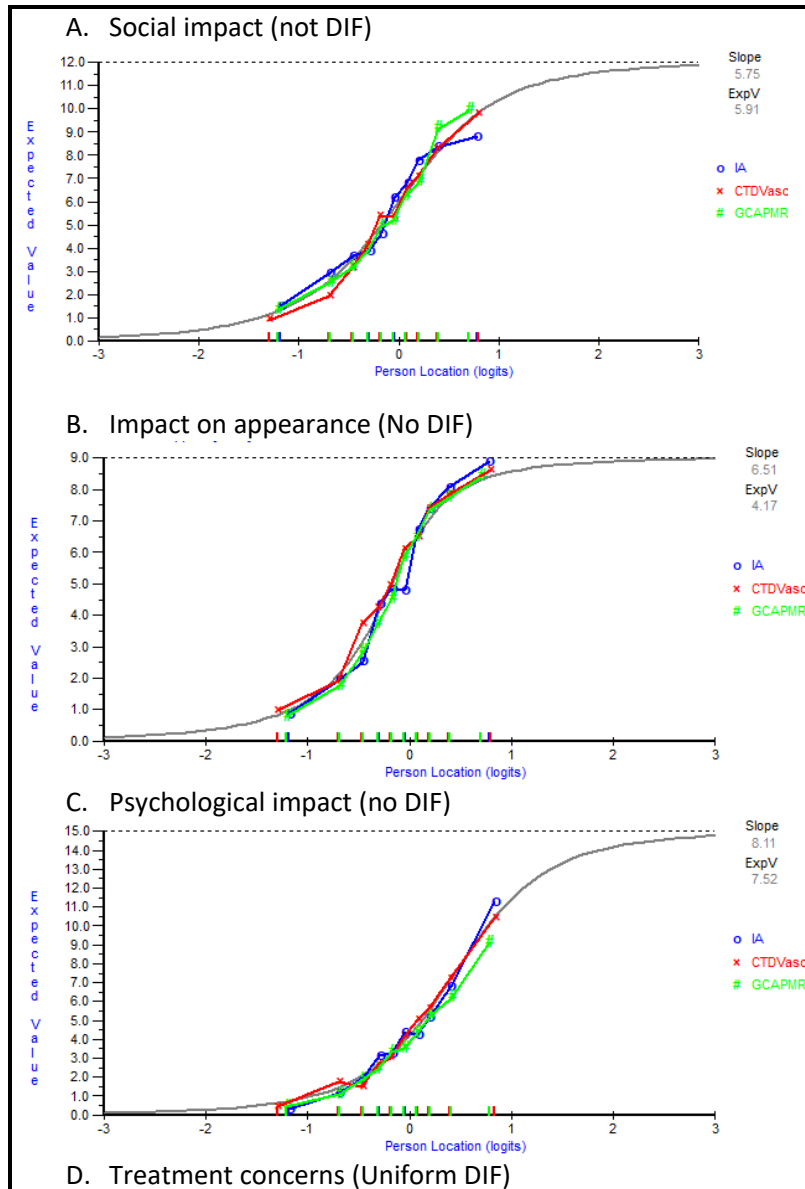

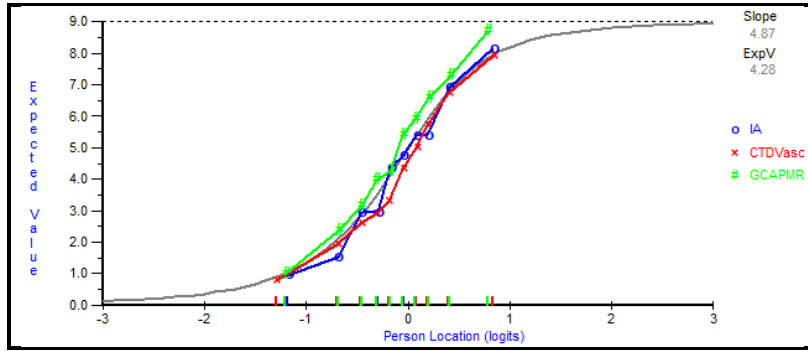

Supplement: ard-2023-224946supp001.pdf [file ard-2023-224946supp001.pdf]
